# Supplementary material
Source: PubMed Central journal article supplement (PMC7382227)
Supplement: pnas.1922927117.sapp.pdf [file pnas.1922927117.sapp.pdf]

# PNAS

www.pnas.org

1  
2  
3  
4  
5  
6  
7  
8  
9  
10  
11  
12  
13  
14  
15  
16  
17  
18  
19

## Supplementary Information for

### Genomic Regions Influencing Aggressive Behavior in Honey Bees are Defined by Colony Allele Frequencies

Arian Avalos, Miaoquan Fang, Hailin Pan, Aixa Ramirez Lluch, Alexander E. Lipka, Sihai Dave Zhao, Tugrul Giray, Gene E. Robinson, Guojie Zhang & Matthew E. Hudson

#### Corresponding Authors:

Gene E. Robinson; **Email:** [generobi@illinois.edu](mailto:generobi@illinois.edu).  
Guojie Zhang; **Email:** [Guojie.Zhang@bio.ku.dk](mailto:Guojie.Zhang@bio.ku.dk).  
Matthew E. Hudson; **Email:** [mhudson@illinois.edu](mailto:mhudson@illinois.edu).

#### This PDF includes:

Captions for Dataset S1-2  
Figs. S1-7

20 **Dataset S1 (annotation\_data\_table\_s1.xlsx).**

21 Data table in Excel format with three sheets corresponding to a legend and reference  
22 information, colony phenotype and collection information, a gene annotation list for the genes  
23 overlapping haplotypes containing a significant SNP, and a list of significant SNPs . The colony  
24 information sheet contains specific information including collection and sampling data as well as  
25 phenotype details for both measures of colony aggression. The gene annotation list contains  
26 information on the 254 genes within genomic regions of significant correlation. Information  
27 includes linkage group, number of haplotype blocks with significant SNPs in overlap with the gene,  
28 *A. mellifera* NCBI gene IDs and names, and gene ID, symbol and name for the nearest *D.*  
29 *melanogaster* homolog. Also highlighted are the subset of 56 genes in overlap with haplotype  
30 blocks also containing markers with evidence of selection. The SNP list contains information on  
31 the specific markers identified by our colony-level analysis. Included are positional information  
32 (linkage group, base pair position), nucleotide information, and resulting p-values for the  
33 individual- and colony-level analysis.

34

35 **Dataset S2 (simulation\_code\_s5.r).**

36 Annotated algorithm which conducts a P-value assessment using simulated Principal  
37 Components. Annotations summarize conceptual framework and provide the model under  
38 consideration for SNP x colony phenotype which mirrors the model considered in the manuscript.

39

40

41

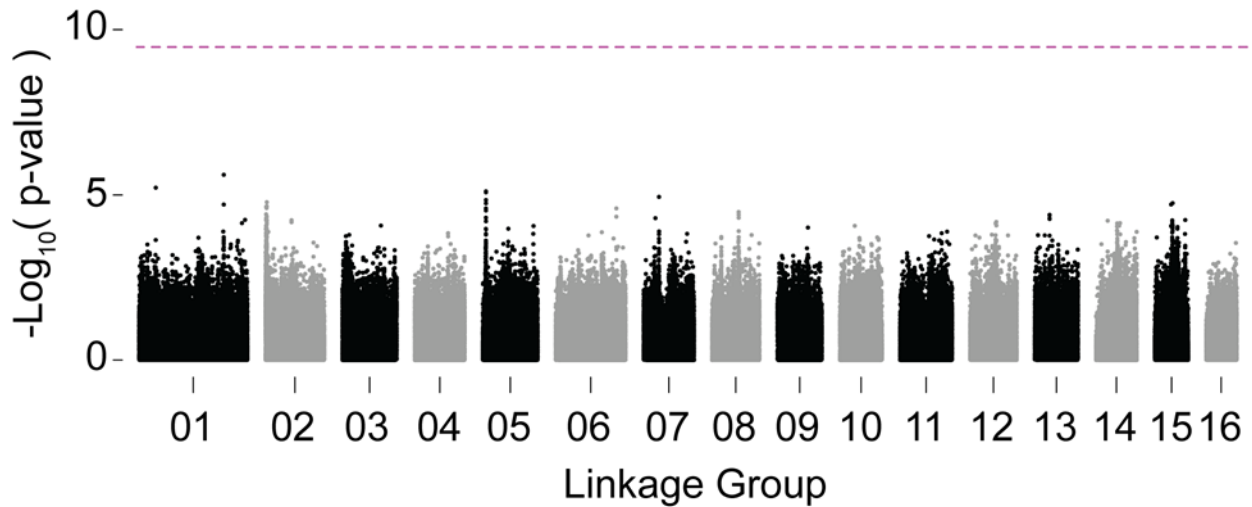

42

43 **Fig. S1. Genome-wide associations of aggression at the individual level.** Manhattan plot of  
 44 P value distributions across the genome for the correlation of individual-level genotype to  
 45 individual behavioral phenotype (Soldier vs. Forager). The dashed magenta line represents the  
 46 Bonferroni adjusted threshold ( $\alpha = 3.35E^{-10}$ ) consistent between individual and colony level  
 47 analyses.

48

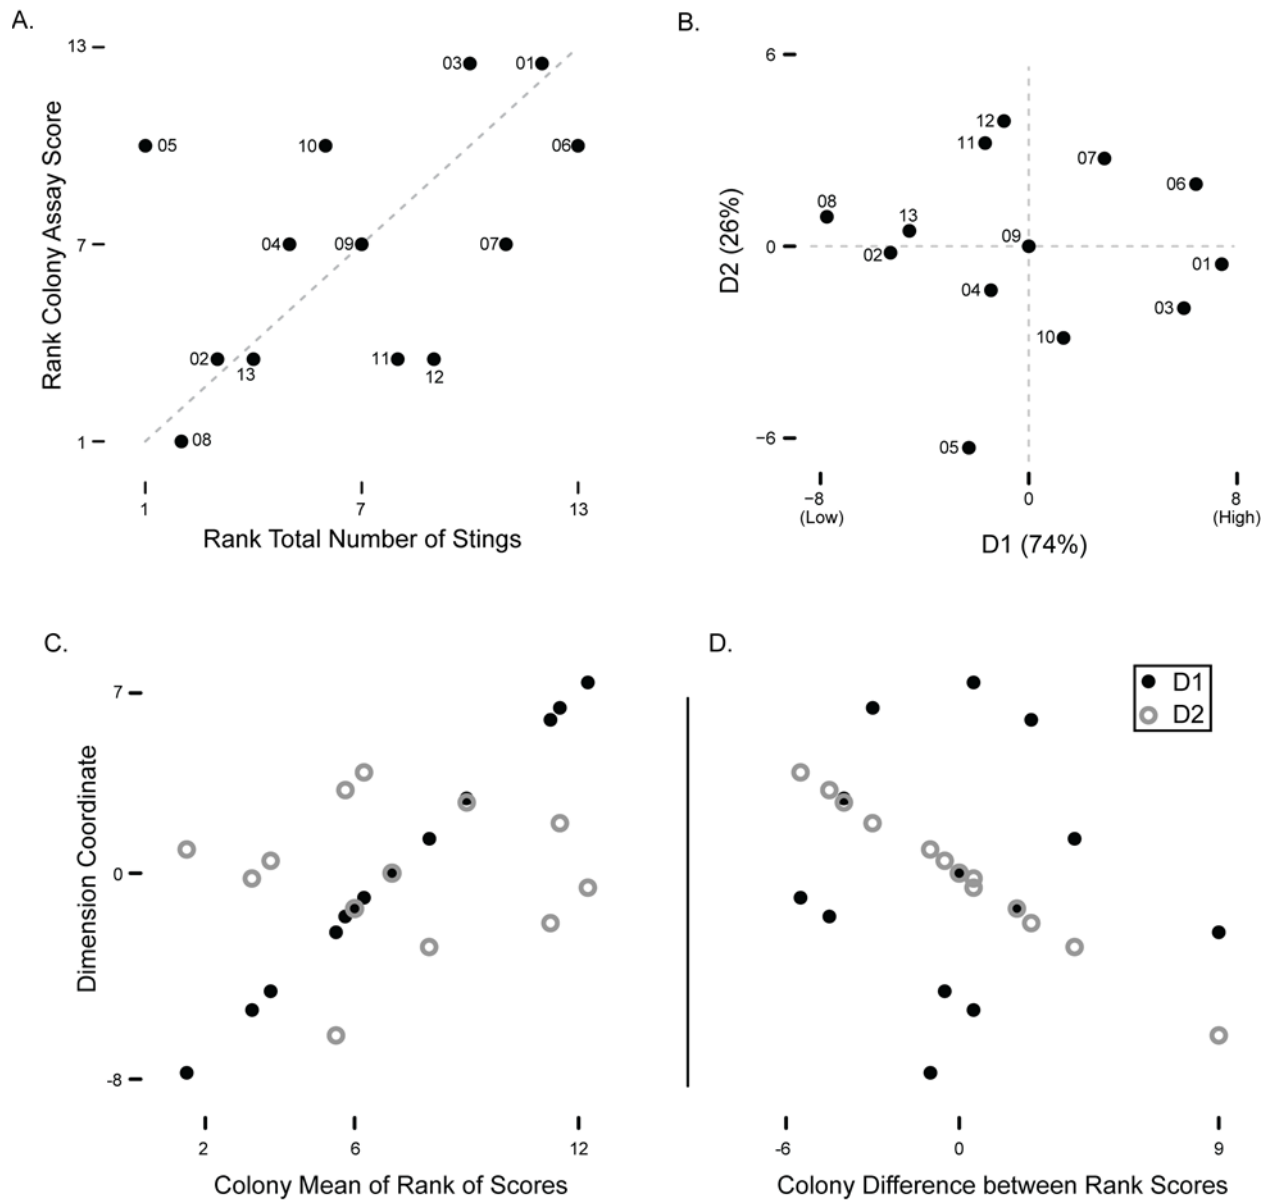

49

50

51 **Fig. S2. Assessment of colony phenotype.** Panel A: correlation between the rank values of the  
 52 response for each colony in the two behavioral assays. Panel B: results from Multidimensional  
 53 Scaling (MDS). In both panels each point corresponds to a colony and is labeled with its colony  
 54 number. Panels C and D summarize the four correlations between the dimension coordinate value  
 55 for each of the colonies and the corresponding summary of phenotype. Panel C summarizes the  
 56 relationship between the dimension value and the per-colony mean of rank scores between the  
 57 two assays. Panel D summarizes the correlation between the same dimensional position and the  
 58 per-colony difference between the ranks of the behavioral assays. As in panels A and B, each  
 59 point is a colony, black points are used when correlating against the first MDS dimension (D1)  
 60 and open grey circles are used when correlating against the second MDS dimension (D2).

61

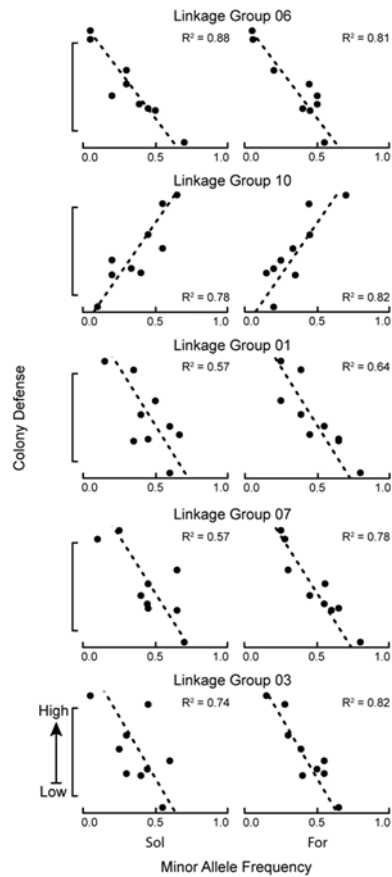

63

64

65 **Fig. S3. Correlation between minor allele frequencies (MAF) for each behavioral group and**  
 66 **the colony phenotype.** Goodness of fit ( $R^2$ ) was estimated to the model function derived from  
 67 the colony-level fit (dashed line). A paired set of plots is provided for each of the top 5 focal SNPs  
 68 of the top 5 peaks of association candidate SNPs (Fig. 1C) one for Soldiers (Sol) and the other  
 69 for Foragers (For). Y axis corresponds to colony defense (D1; SI Appendix, Fig. S2), X axis to the  
 70 MAF, and each point represents a colony.

71

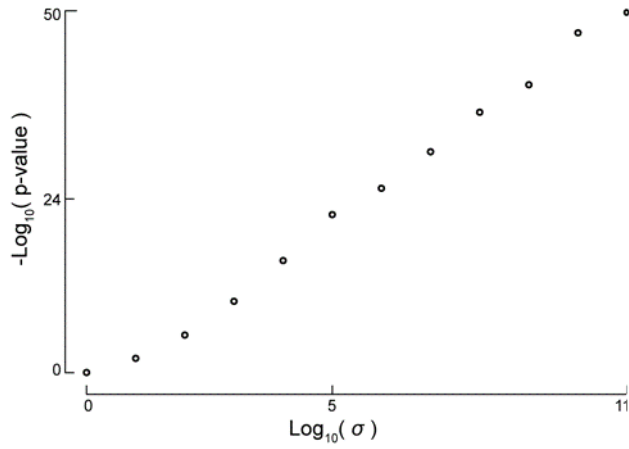

72  
73  
74  
75  
76  
77

**Fig. S4. Relationship between a range of simulated residual variances and resulting P values.** In our analysis, even with  $N = 9$ , as residual variance decreases, p-values reach levels of 10 - 50 ( $1.00E^{-10} - 1.00E^{-50}$ ), as we detected (Fig. 1).

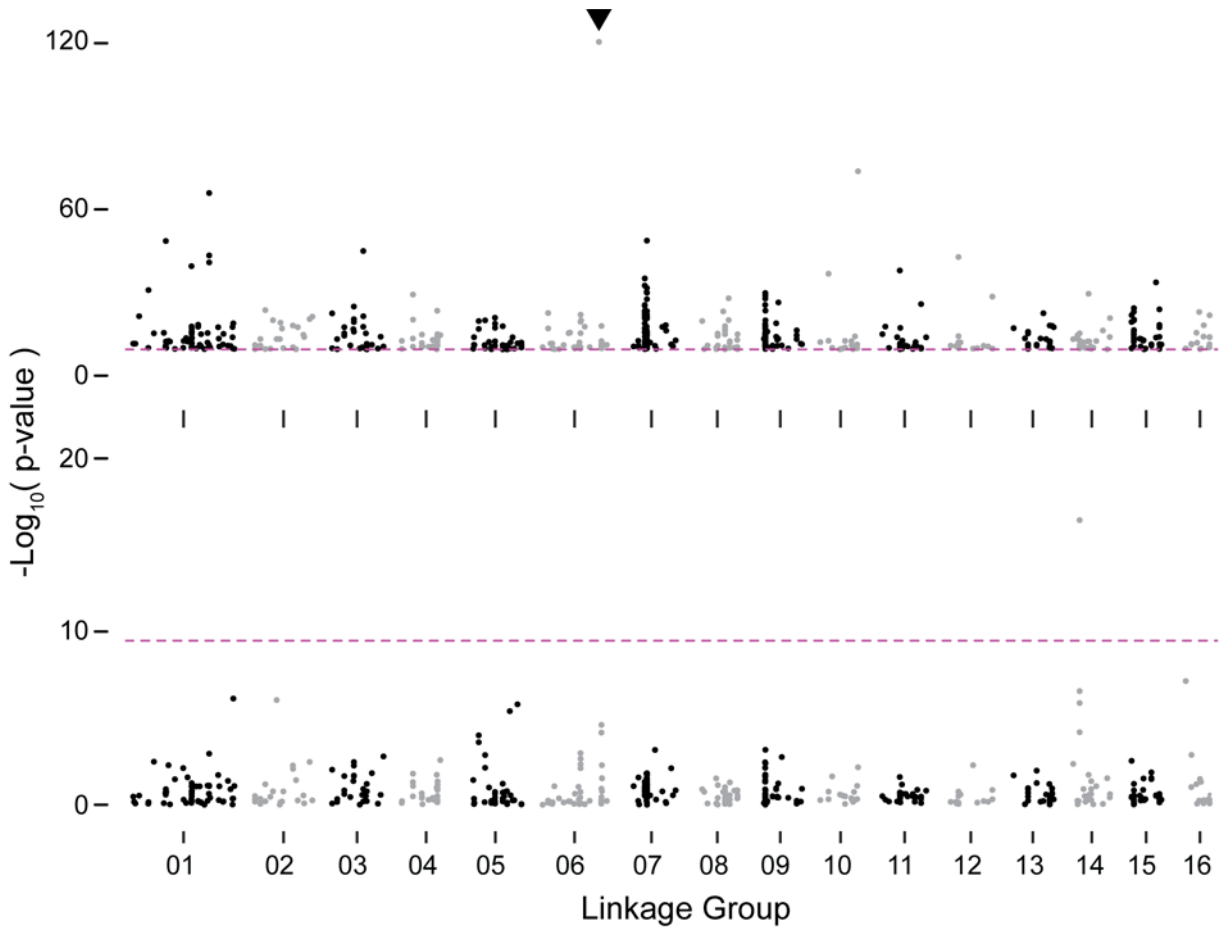

78  
79  
80  
81  
82  
83  
84  
85

**Fig. S5. Analysis of covariation across top candidate SNPs.** Top panel: P values of SNPs from Fig 1C that pass the significance threshold, plotted against genomic location. Bottom panel: P values of significant SNPs from Fig 1C with the most significant SNP (highlighted by the black triangle) included in the model as a covariate.



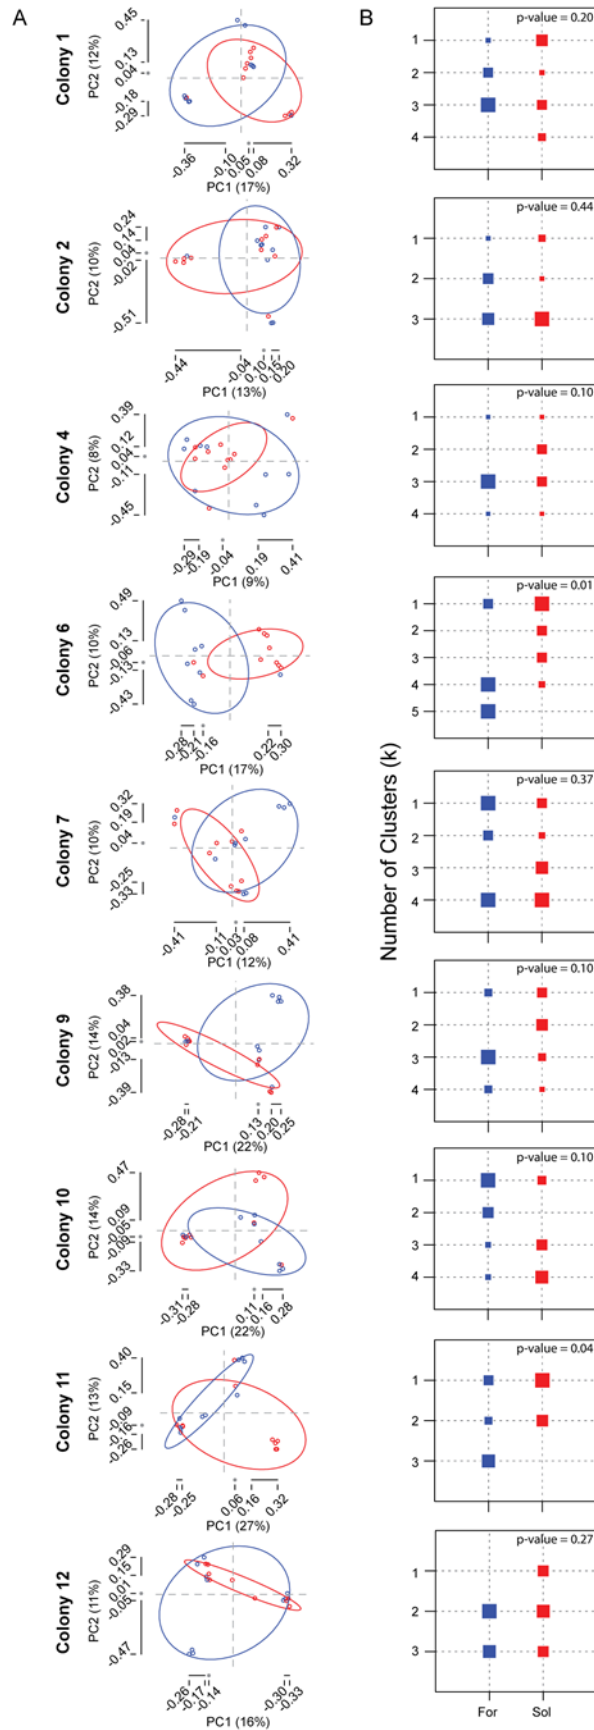

87 **Fig. S6. Analysis of concordance of genetic diversity with aggressive phenotype within**  
88 **each colony.** (A) Principal component analysis of genetic variation is summarized by the first two  
89 principal components derived from the genotype matrix for each colony. Each point corresponds  
90 to a sample, and each sample is colored by behavioral group: blue = Forager (For), red = Soldier  
91 (Sol). An ellipse encapsulating 65% of the samples within a behavioral group (~7 in each group)  
92 is provided to further highlight distribution of the behavioral groups across the PC space. (B)  
93 Optimal number of clusters was determined via iterative k-means clustering and the elbow method  
94 using the within-group total sum of squares. The distribution of behavioral groups between genetic  
95 clusters was assessed for each colony using a Fisher's exact test (P value at top right of table).

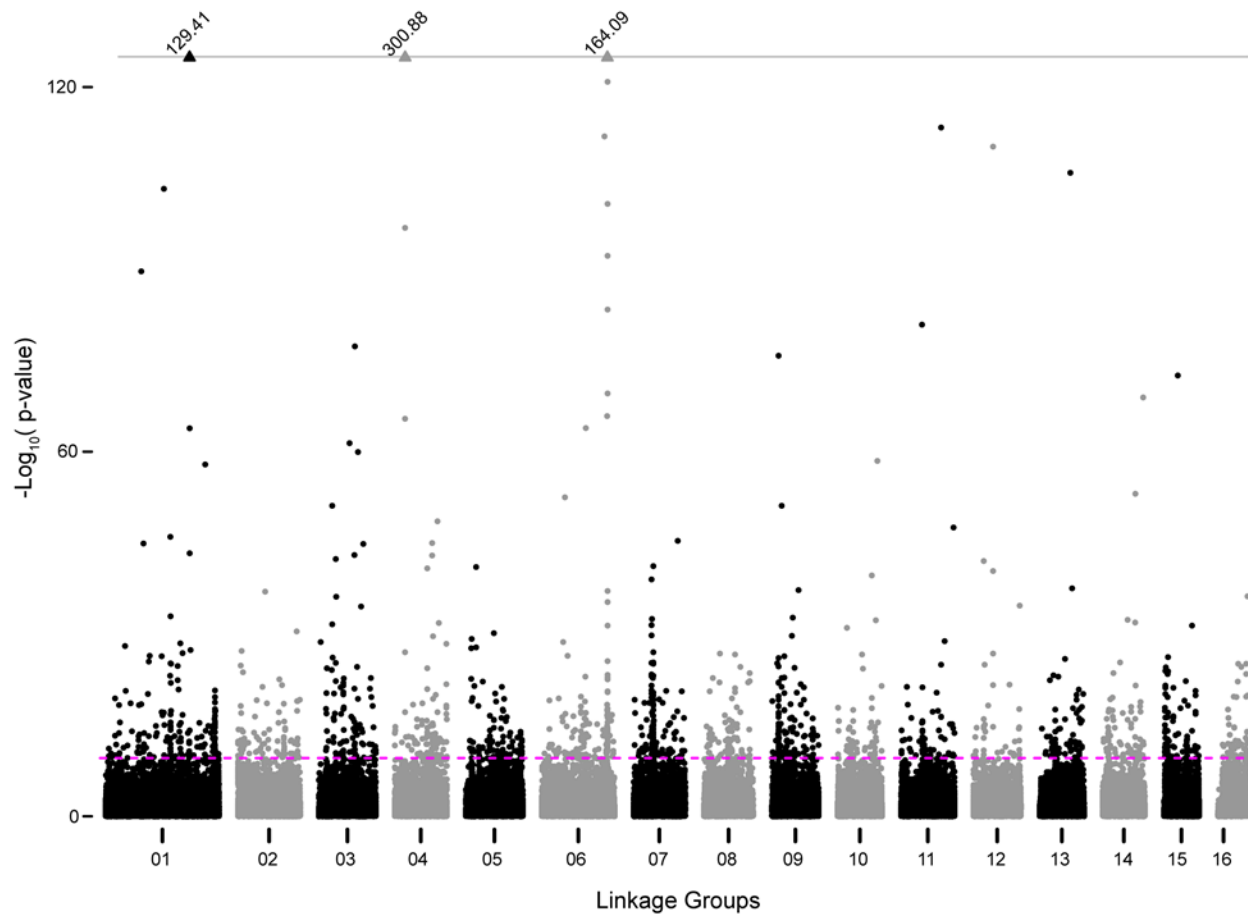

96  
 97 **Figure S7. Genome-wide associations of aggression at the group level considering original**  
 98 **geographic source of colony.** Manhattan plot of minimum p-value in each haplotype block resulting from  
 99 an association of colony-level minor allele frequency across the genome to colony aggression phenotype,  
 100 considering geographic source of colony as a covariate. Dashed line shows significance threshold  
 101 (Bonferroni corrected  $\alpha = 7.67E^{-10}$ ). Outlier haplotype blocks are highlighted as triangles aligned on an  
 102 arbitrary limit bar, and the  $-\log_{10}(p\text{-value})$  is provided separately above the triangle.
